# Supplementary figures and images for: Disseminated intravascular coagulation complicating diagnosis of ROS1‐mutant non‐small cell lung cancer: A case report and literature review
Source: PubMed Central journal article supplement — Thorac Cancer. 2021 Jul 22;12(17):2400–3. doi: 10.1111/1759-7714.14071 (PMC8410535; doi:10.1111/1759-7714.14071), 2021-07-22

# PT, INR, APTT, Fibrinogen Level, & D-Dimer

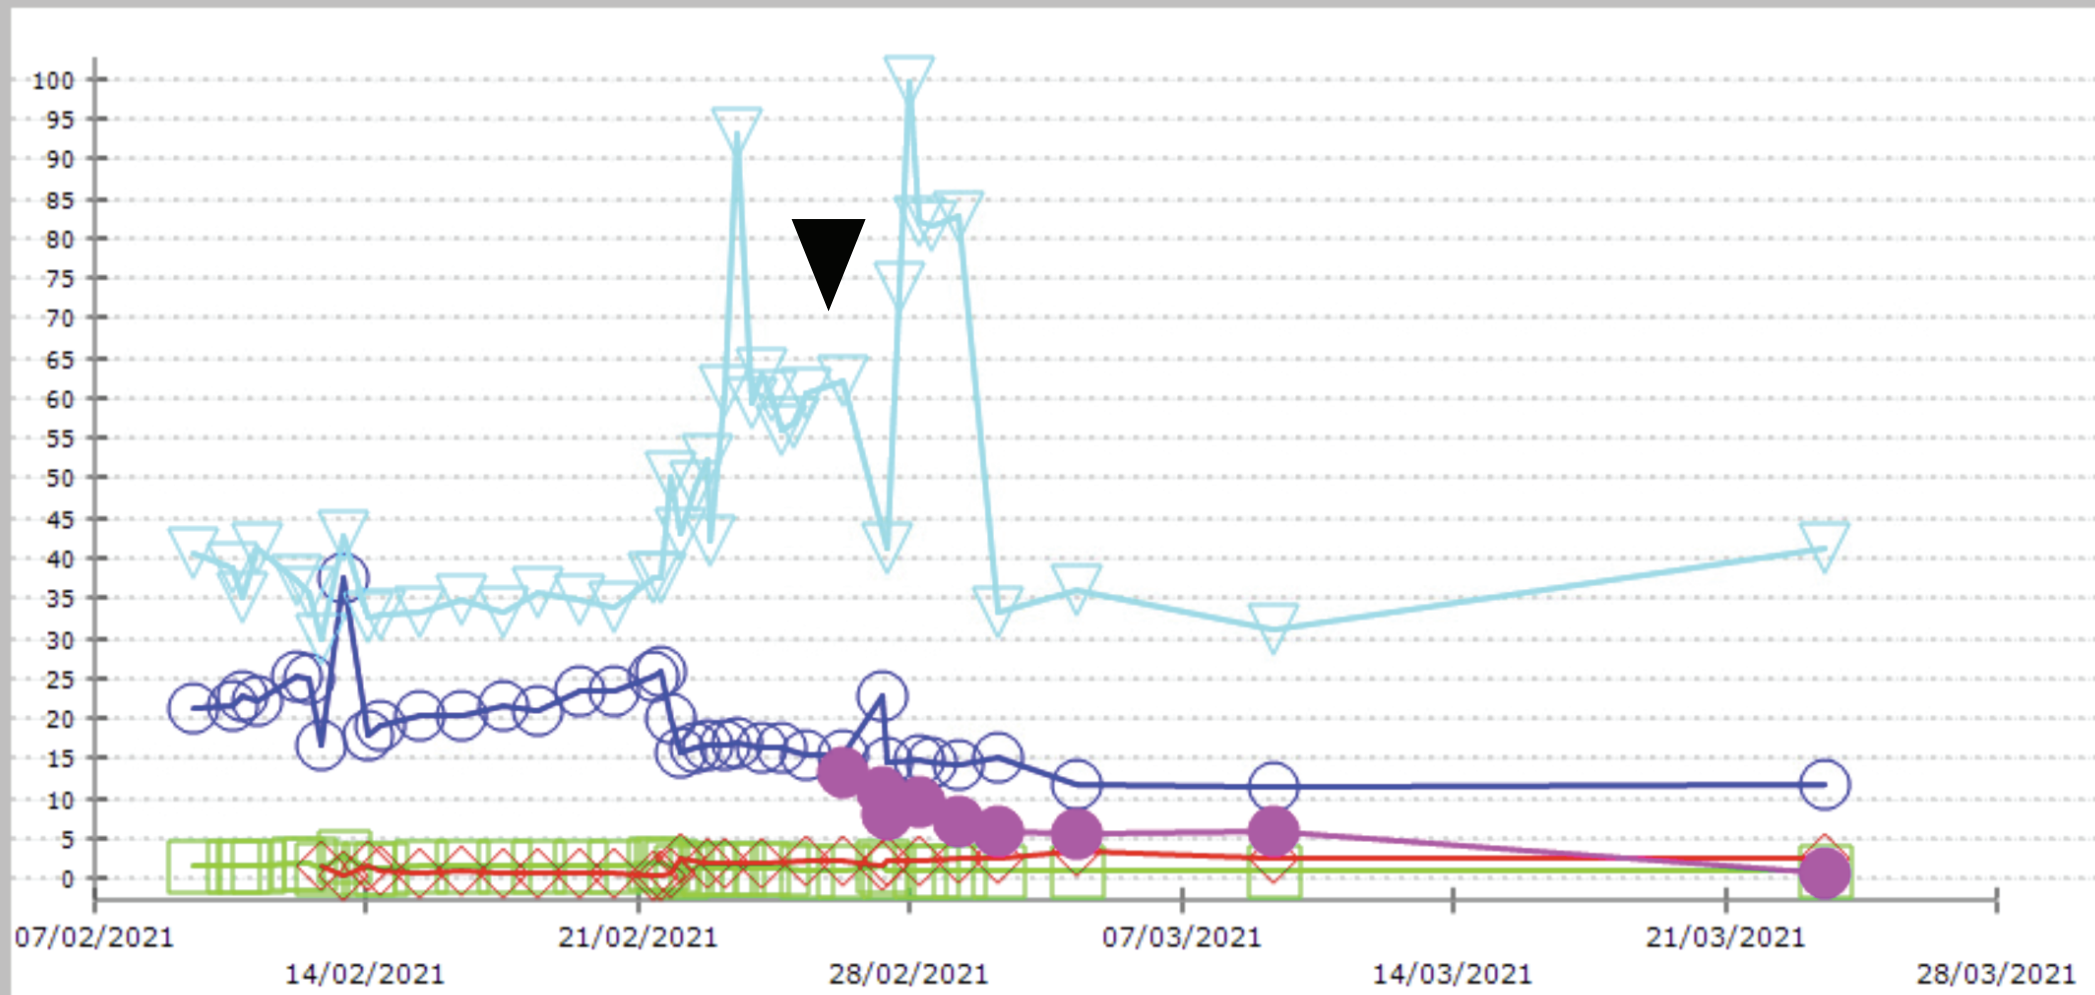

○ PT   □ INR   ▼ APTT   ◇ Fibrinogen Level   ● D-Dimer

Supplement: TCA-12-2400-s001.pdf [file TCA-12-2400-s001.pdf]

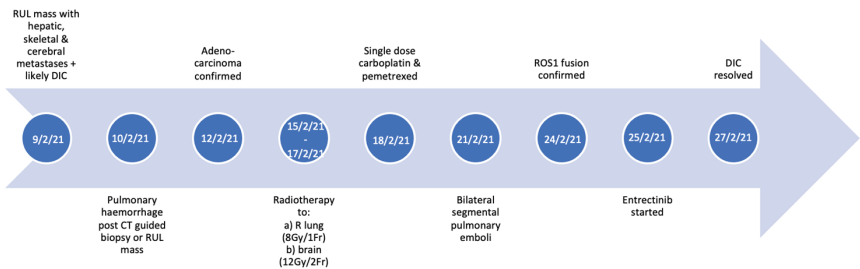

Supplement: TCA-12-2400-s003.pdf [file TCA-12-2400-s003.pdf]
